# Supplementary material for: Handheld Raman Spectroscopy in the First UK Home Office Licensed Pharmacist-Led Community Drug Checking Service
Source: MDPI journal article supplement (doi:10.3390/ijerph20064793), 2023-03-08
Supplement: s1 [file s1]

**Supplementary Materials:**

**Table S1.** Raman peak assignments for both cocaine and diazepam

Literature data from Penido et. Al. 2016 [59]

| <b>COCAINE</b>           |                                 |                                           |                                       |                                         |
|--------------------------|---------------------------------|-------------------------------------------|---------------------------------------|-----------------------------------------|
| <b>Functional groups</b> | <b>Mode</b>                     | <b>Literature peaks (cm<sup>-1</sup>)</b> | <b>Rigaku peaks (cm<sup>-1</sup>)</b> | <b>Renishaw peaks (cm<sup>-1</sup>)</b> |
| C–C tropane ring         | Stretching                      | ~898                                      | ~899 w                                | ~870 m                                  |
| C–C tropane ring         | Stretching                      | ~874                                      | ~870 m                                | ~896 w                                  |
| Aromatic ring            | Symmetric stretching –breathing | ~1004                                     | ~1000 s                               | ~1000 s                                 |
| Aromatic ring            | Asymmetric stretching           | ~1026                                     | ~1028 m                               | ~1026 m                                 |
| C–N                      | Stretching                      | ~1279                                     | ~1274 m/w                             | ~1278 m/w                               |
| CH <sub>3</sub>          | Asymmetric deformation          | ~1462                                     | ~1460 w                               | ~1459 w                                 |
| C=C                      | Ring stretching                 | ~1601                                     | ~1596 vs                              | ~1598 s                                 |
| C=O                      | Symmetric stretching            | ~1716                                     | ~1716 s                               | ~1716 s                                 |

Literature data from Gunaserakan et al., 2006 [60]

| <b>DIAZEPAM</b>          |                       |                                           |                                       |                                         |
|--------------------------|-----------------------|-------------------------------------------|---------------------------------------|-----------------------------------------|
| <b>Functional groups</b> | <b>Mode</b>           | <b>Literature peaks (cm<sup>-1</sup>)</b> | <b>Rigaku peaks (cm<sup>-1</sup>)</b> | <b>Renishaw peaks (cm<sup>-1</sup>)</b> |
| C–N–C                    | Asymmetric bending    | ~698 vw                                   | ~695 m/w                              | ~690 m                                  |
| —                        | —                     | —                                         | ~1000 m                               | ~998 w/m                                |
| C–C                      | Stretching            | ~1321 vw                                  | ~1315 s                               | ~1312 s                                 |
| C–N                      | Symmetric stretching  | ~1174 vw                                  | ~1169 m                               | ~1168 m                                 |
| C-C aromatic ring        | Asymmetric stretching | ~1561 m/w                                 | ~1567 w                               | ~1562 w                                 |
| C=N                      | Stretching            | ~1599 vs                                  | ~1594 vs                              | ~1593 vs                                |
| C=O                      | Stretching            | ~1690 w                                   | ~1689 m/w                             | ~1685 m/w                               |
